# Supplementary material for: Evaluating different extraction solvents for GC-MS based metabolomic analysis of the fecal metabolome of adult and baby giant pandas
Source: PubMed Central journal article supplement (PMC6700143; doi:10.1038/s41598-019-48453-1), 2019-08-19
Supplement: 41598_2019_48453_MOESM1_ESM.pdf [file 41598_2019_48453_MOESM1_ESM.pdf]

# Evaluating different extraction solvents for GC-MS based metabolomic analysis of the fecal metabolome of adult and baby giant pandas

Yang yang<sup>1,2,3</sup>, Yanqiang Yin<sup>4</sup>, Xuyang Chen<sup>1</sup>, Chang Chen<sup>1,5</sup>, Yinyin Xia<sup>6</sup>, Hongbo Qi<sup>1,2,3</sup>, Philip N. Baker<sup>1,7</sup>, Hua Zhang<sup>1,2,3\*</sup>, Ting-Li Han<sup>1,2,3,\*</sup>

**Supplementary table S1** Number of identified metabolites and CVs of each biochemical compound class identified in adult giant panda feces, compared across six different extraction methods

| Biochemical Classes                | IPA:ACN:H2O (3:2:2) |           | MeOH (100%) |           | MeOH (80%) |          | MeOH:CHCl3(3:1) |           | ACN(100%) |           | ACN:CHCl3(3:1) |          |
|------------------------------------|---------------------|-----------|-------------|-----------|------------|----------|-----------------|-----------|-----------|-----------|----------------|----------|
|                                    | #                   | CV±SD     | #           | CV±SD     | #          | CV±SD    | #               | CV±SD     | #         | CV±SD     | #              | CV±SD    |
| Alkanes                            | 2                   | 2.6±0.1   | 2           | 5.0±2.4   | 2          | 9.1±3.2  | 3               | 14.9±14.8 | 5         | 32.0±1.7  | 4              | 13.5±3.9 |
| Amino acids                        | 17                  | 21.5±5.8  | 18          | 12.8±4.6  | 18         | 8.7±3.7  | 18              | 20.8±5.3  | 12        | 23.1±10.6 | 11             | 14.5±3.0 |
| Amino acid derivatives             | 5                   | 12.9±7.2  | 4           | 14.5±5.8  | 3          | 10.6±2.8 | 4               | 19.8±7.7  | 2         | 55.5±44.9 | 1              | 6.3      |
| Benzoic acid derivatives           | 6                   | 11.0±5.5  | 6           | 8.5±3.6   | 6          | 6.6±2.5  | 6               | 5.3±1.6   | 6         | 30.1±4.4  | 6              | 7.8±3.7  |
| Nicotinamides and vitamins         | 2                   | 19.7±8.6  | 2           | 10.5±6.5  | 2          | 13.4±3.3 | 1               | 21        | 1         | 28.0±     | 1              | 11       |
| Long-chain saturated fatty acids   | 9                   | 10.7±3.8  | 9           | 12.8±9.7  | 8          | 11.2±6.3 | 8               | 11.3±4.9  | 10        | 28.3±3.5  | 10             | 13.7±4.9 |
| Long-chain unsaturated fatty acids | 7                   | 8.7±5.8   | 5           | 8.5±6.0   | 8          | 7.6±3.2  | 9               | 8.1±4.3   | 8         | 30.0±2.8  | 8              | 10.8±2.2 |
| TCA cycle intermediates            | 5                   | 16.1±5.6  | 5           | 8.3±5.5   | 5          | 8.0±4.2  | 5               | 18.8±7.4  | 3         | 9.0±5.7   | 1              | 6.4      |
| Medium-chain saturated fatty acids | 6                   | 10.3±4.8  | 7           | 7.8±3.8   | 7          | 9.3±3.1  | 6               | 10.6±6.7  | 6         | 30.2±4.7  | 5              | 9.1±1.1  |
| Secondary metabolites              | 3                   | 21.6±18.3 | 3           | 12.3±10.1 | 3          | 10.1±6.8 | 3               | 16.8±9.8  | 3         | 18.2±6.0  | 2              | 22.2±5.0 |
| Sum of classified metabolites      | 62                  | 15.1±8.7  | 61          | 11.4±6.6  | 62         | 9.8±4.8  | 63              | 14.2±7.8  | 56        | 27.5±10.9 | 49             | 11.8±4.8 |
| Total identified metabolites       | 108                 | 16.2±10.9 | 104         | 12.9±9.2  | 110        | 10.6±6.0 | 100             | 14.1±8.0  | 84        | 26.8±10.5 | 73             | 13.1±6.1 |

#: Number of identified metabolites; CV: coefficient of variance in %; SD: standard deviations in %

**Supplementary table S2.** Number of identified metabolites and CVs of each biochemical compound class identified in baby giant panda feces, compared across six different extraction methods

| Biochemical Classes                | IPA:ACN:H <sub>2</sub> O<br>(3:2:2) |           | MeOH (100%) |            | MeOH (80%) |           | MeOH:CHCl <sub>3</sub><br>(3:1) |           | ACN (100%) |           | ACN:CHCl <sub>3</sub><br>(3:1) |           |
|------------------------------------|-------------------------------------|-----------|-------------|------------|------------|-----------|---------------------------------|-----------|------------|-----------|--------------------------------|-----------|
|                                    | #                                   | CV±SD     | #           | CV±SD      | #          | CV±SD     | #                               | CV±SD     | #          | CV±SD     | #                              | CV±SD     |
| Alkanes                            | 2                                   | 4.0±0.8   | 3           | 5.6±5.3    | 3          | 7.4±1.4   | 3                               | 7.5±0.8   | 4          | 14.4±6.0  | 4                              | 7.0±1.5   |
| Amino acids                        | 18                                  | 12.3±14.1 | 16          | 9.1±7.6    | 17         | 13.3±9.0  | 16                              | 10.1±4.6  | 12         | 52.7±30.3 | 8                              | 11.1±8.2  |
| Amino acid derivatives             | 5                                   | 10.0±7.6  | 6           | 26.37±26.4 | 3          | 22.0±23.9 | 4                               | 8.7±2.3   | 3          | 14.8±7.0  | 2                              | 7.5±2.0   |
| Benzoic acid derivatives           | 3                                   | 5.5±3.2   | 2           | 5.0±0.8    | 3          | 8.7±2.6   | 1                               | 6         | 2          | 10.9±0.6  | 2                              | 9.5±5.2   |
| Nicotinamides and Vitamines        | 1                                   | 8         | 1           | 7          | 1          | 10        | 1                               | 14        | 1          | 15        | 1                              | 6         |
| Long-chain saturated fatty acids   | 12                                  | 5.28±2.01 | 12          | 10.0±3.8   | 9          | 8.1±4.5   | 12                              | 8.9±2.9   | 13         | 16.2±6.5  | 13                             | 12.1±7.4  |
| Long-chain unsaturated fatty acids | 15                                  | 5.13±3.67 | 16          | 8.1±3.6    | 15         | 10.9±5.3  | 15                              | 6.9±3.2   | 16         | 14.7±1.9  | 16                             | 11.8±4.1  |
| TCA cycle intermediates            | 6                                   | 8.29±2.4  | 5           | 13.5±3.2   | 6          | 8.8±3.9   | 5                               | 19.5±21.4 | 3          | 20.8±4.5  | 3                              | 25.0±17.1 |
| Medium-chain saturated fatty acids | 7                                   | 10.1±2.7  | 7           | 10.5±4.7   | 6          | 13.6±7.2  | 7                               | 12.1±5.0  | 5          | 13.2±4.5  | 6                              | 12.3±5.6  |
| Secondary metabolites              | 3                                   | 8.7±7.7   | 3           | 12.2±3.4   | 3          | 9.6±8.9   | 3                               | 14.2±3.0  | 2          | 28.1±2.0  | 2                              | 17.2±7.1  |
| Sum of classified metabolites      | 72                                  | 8.7±7.8   | 71          | 10.9±10.0  | 66         | 10.9±7.6  | 67                              | 10.5±7.8  | 61         | 24.5±26.3 | 57                             | 11.9±6.6  |
| Total identified metabolites       | 120                                 | 10.0±8.5  | 106         | 12.0±12.2  | 107        | 12.6±9.7  | 102                             | 11.7±11.4 | 85         | 25.3±26.1 | 79                             | 12.6±8.0  |

#: Number of identified metabolites; CV: coefficient of variance in %; SD: standard deviations in %

**Supplementary Table S3.** The analytical information of identified metabolites in the giant panda feces

| Name          | Classification | Reference Ion | Retention time (min) | Library match | Peak width |
|---------------|----------------|---------------|----------------------|---------------|------------|
| Dodecane      | Alkanes        | 57            | 8.757                | 99            | 4.8        |
| Heptadecane   | Alkanes        | 57            | 15.662               | 81            | 5.5        |
| Pentadecane   | Alkanes        | 57            | 13.131               | 90            | 5.4        |
| Tricosane     | Alkanes        | 57            | 24.276               | 81            | 4          |
| Tridecane     | Alkanes        | 57            | 10.303               | 93            | 6.6        |
| Alanine       | Amino acids    | 102           | 10.209               | 96            | 2.7        |
| Asparagine    | Amino acids    | 127           | 15.606               | 75            | 4.5        |
| Aspartic acid | Amino acids    | 160           | 15.402               | 99            | 3.95       |
| Cysteine      | Amino acids    | 192           | 18.605               | 96            | 5.45       |
| Glutamic acid | Amino acids    | 174           | 17.081               | 95            | 4.15       |
| Glycine       | Amino acids    | 88            | 10.548               | 82            | 4.2        |
| Histidine     | Amino acids    | 139           | 25.568               | 89            | 5.9        |
| Isoleucine    | Amino acids    | 115           | 13.202               | 99            | 3.95       |
| Leucine       | Amino acids    | 144           | 13.155               | 98            | 4          |
| Lysine        | Amino acids    | 142           | 24.908               | 86            | 5.75       |
| Methionine    | Amino acids    | 147           | 17.134               | 86            | 4.45       |
| Phenylalanine | Amino acids    | 162           | 18.499               | 99            | 5.45       |

|                                          |                               |     |        |     |      |
|------------------------------------------|-------------------------------|-----|--------|-----|------|
| Proline                                  | Amino acids                   | 128 | 14.105 | 99  | 4.3  |
| Serine                                   | Amino acids                   | 100 | 16.443 | 83  | 4.1  |
| Threonine                                | Amino acids                   | 115 | 14.714 | 98  | 5.75 |
| Tryptophan                               | Amino acids                   | 130 | 31.186 | 99  | 8.95 |
| Tyrosine                                 | Amino acids                   | 236 | 27.006 | 99  | 7.35 |
| Valine                                   | Amino acids                   | 130 | 11.9   | 100 | 3.9  |
| beta-Alanine                             | Amino acids and derivatives   | 88  | 11.801 | 96  | 4.5  |
| beta-Citryl-L-glutamic acid              | Amino acids and derivatives   | 143 | 29.923 | 75  | 8.9  |
| N-(Carboxymethyl)-L-alanine              | Amino acids and derivatives   | 174 | 14.482 | 75  | 5.1  |
| N-Acetylglutamic acid                    | Amino acids and derivatives   | 116 | 17.895 | 76  | 4.9  |
| N-alpha-Acetyllysine                     | Amino acids and derivatives   | 129 | 27.7   | 91  | 8.2  |
| Ornithine                                | Amino acids and derivatives   | 128 | 23.703 | 94  | 4.45 |
| Pyroglutamic acid                        | Amino acids and derivatives   | 84  | 15.415 | 90  | 5.3  |
| Benzoic acid                             | Benzoic acids and derivatives | 105 | 8.711  | 98  | 6.05 |
| DBP                                      | Benzoic acids and derivatives | 149 | 22.774 | 86  | 4.2  |
| Hydroxybenzoic acid                      | Benzoic acids and derivatives | 135 | 16.23  | 97  | 4.05 |
| Salicylic acid                           | Benzoic acids and derivatives | 135 | 15.873 | 87  | 4.15 |
| 4-Methyl-2-oxopentanoic acid             | Keto acids and derivatives    | 85  | 7.021  | 94  | 4.1  |
| Levulinic acid                           | Keto acids and derivatives    | 99  | 8.218  | 75  | 5    |
| 2-Aminoadipic acid                       | Medium-chain fatty acids      | 114 | 18.568 | 83  | 5.2  |
| Adipic acid                              | Medium-chain fatty acids      | 114 | 11.505 | 85  | 6.15 |
| Azelaic acid                             | Medium-chain fatty acids      | 185 | 15.585 | 82  | 4.2  |
| Capric acid                              | Medium-chain fatty acids      | 74  | 11.654 | 92  | 4.5  |
| Decanoic acid (C10_0)                    | Medium-chain fatty acids      | 74  | 11.656 | 88  | 5.1  |
| Dodecanoic acid (C12_0)                  | Medium-chain fatty acids      | 74  | 14.366 | 98  | 3.9  |
| Hexanoic acid (C6_0)                     | Medium-chain fatty acids      | 74  | 8.223  | 75  | 4.2  |
| Octanoic acid (C8_0)                     | Medium-chain fatty acids      | 74  | 8.616  | 84  | 5.55 |
| Suberic acid                             | Medium-chain fatty acids      | 129 | 14.312 | 92  | 4.15 |
| Nicotinamide                             | Nicotinamides and Vitamines   | 57  | 7.172  | 77  | 5.8  |
| Nicotinic acid                           | Nicotinamides and Vitamines   | 137 | 9.852  | 78  | 6.05 |
| 10,13-dimethyltetradecanoic acid (C17_0) | Saturated fatty acids         | 74  | 19.746 | 98  | 14   |
| 2-Methyloctadecanoic acid                | Saturated fatty acids         | 88  | 23.939 | 76  | 4.9  |

|                                               |                                     |     |        |    |      |
|-----------------------------------------------|-------------------------------------|-----|--------|----|------|
| Arachidic acid (C20_0)                        | Saturated fatty acids               | 74  | 25.558 | 89 | 5.75 |
| Arachidonic acid (C20_4n-6,9,12,15c)          | Saturated fatty acids               | 79  | 25.125 | 98 | 6.15 |
| Behenic acid (C22_0)                          | Saturated fatty acids               | 74  | 28.679 | 85 | 5.55 |
| Heneicosanoic acid (C21_0)                    | Saturated fatty acids               | 74  | 27.068 | 70 | 7.1  |
| Lignoceric acid (C24_0)                       | Saturated fatty acids               | 74  | 31.479 | 88 | 8.55 |
| Margaric acid (C17_0)                         | Saturated fatty acids               | 74  | 21.938 | 96 | 9.05 |
| Myristic acid (C14_0)                         | Saturated fatty acids               | 74  | 16.81  | 98 | 3.95 |
| Nonadecanoic acid (C19_0)                     | Saturated fatty acids               | 74  | 24.328 | 75 | 4.95 |
| Palmitic acid (C16_0)                         | Saturated fatty acids               | 74  | 19.756 | 81 | 9    |
| Pentadecanoic acid (C15_0)                    | Saturated fatty acids               | 74  | 18.056 | 84 | 4.9  |
| Stearic acid (C18_0)                          | Saturated fatty acids               | 74  | 23.308 | 76 | 7    |
| Tricosanoic acid (C23_0)                      | Saturated fatty acids               | 74  | 29.944 | 81 | 7.45 |
| Creatinine                                    | Secondary metabolites               | 202 | 15.83  | 96 | 3.9  |
| Glutathione                                   | secondary metabolites               | 142 | 17.631 | 91 | 4.9  |
| Lactic acid                                   | secondary metabolites               | 103 | 8.328  | 99 | 4.4  |
| 2-Oxoglutaric acid                            | Tricarboxylic acids and derivatives | 115 | 12.182 | 91 | 4.35 |
| cis-Aconitic acid                             | Tricarboxylic acids and derivatives | 153 | 14.601 | 76 | 4.85 |
| Citric acid                                   | Tricarboxylic acids and derivatives | 143 | 15.433 | 80 | 4.9  |
| Fumaric acid                                  | Tricarboxylic acids and derivatives | 113 | 8.295  | 82 | 5.1  |
| Malic acid                                    | Tricarboxylic acids and derivatives | 103 | 10.437 | 97 | 4.05 |
| Succinic acid                                 | Tricarboxylic acids and derivatives | 115 | 8.154  | 98 | 4.85 |
| 10,12-octadecadienoic acid (C18_2n-10,12c)    | Unsaturated fatty acids             | 67  | 23.736 | 79 | 5.05 |
| 10-Heptadecenoic acid (C17_1n-7t)             | Unsaturated fatty acids             | 55  | 21.719 | 97 | 9    |
| 11,14,17-Eicosatrienoic acid (C20_3n-3,6,9c)  | Unsaturated fatty acids             | 79  | 25.634 | 93 | 6.35 |
| 11,14-Eicosadienoic (C20_2n-6,9c)             | Unsaturated fatty acids             | 67  | 25.409 | 94 | 6    |
| 13,16-Docosadienoic acid (C22_2n-6,9c)        | Unsaturated fatty acids             | 67  | 28.569 | 75 | 6.3  |
| Adrenic acid (C22_4n-6,9,12,15c)              | Unsaturated fatty acids             | 79  | 28.289 | 96 | 6.55 |
| bishomo-gamma-Linolenic acid (C20_3n-6,9,12c) | Unsaturated fatty acids             | 79  | 25.278 | 88 | 5.75 |
| Conjugated linoleic acid (C18_2n-9,11c)       | Unsaturated fatty acids             | 67  | 23.738 | 76 | 5.4  |
| DHA (C22_6n-3,6,9,12,15,18c)                  | Unsaturated fatty acids             | 79  | 28.38  | 98 | 5.6  |
| DPA (C22_5n-3,6,9,12,15c)                     | Unsaturated fatty acids             | 79  | 28.504 | 91 | 5.25 |
| gamma-Linolenic acid (C18_3n-6,9,12c)         | Unsaturated fatty acids             | 79  | 23.318 | 93 | 6.8  |
| Gondoic acid (C20_1n-9c)                      | Unsaturated fatty acids             | 79  | 25.334 | 71 | 6.15 |
| Linoleic acid (C18_2n-6,9c)                   | Unsaturated fatty acids             | 67  | 23.176 | 94 | 7.1  |

|                                |                         |    |        |    |      |
|--------------------------------|-------------------------|----|--------|----|------|
| Myristoleic acid (C14_1n-5c)   | Unsaturated fatty acids | 55 | 16.661 | 75 | 4.3  |
| Nervonic acid (C24_1n-9c)      | Unsaturated fatty acids | 55 | 31.236 | 90 | 8.5  |
| Oleic acid (C18_1n-9c)         | Unsaturated fatty acids | 55 | 23.154 | 98 | 5.7  |
| Palmitelaidic acid (C16_1n-9c) | Unsaturated fatty acids | 55 | 19.477 | 99 | 6.5  |
| Palmitoleic acid (C16_1n-7c)   | Unsaturated fatty acids | 55 | 19.741 | 99 | 6.4  |
| trans-Vaccenic acid            | Unsaturated fatty acids | 55 | 23.131 | 98 | 5.75 |

**Supplementary Table S4.** The semi-quantitative log values of identified metabolites in adult giant panda feces, across the six different extraction methods

| Identified metabolite names | Biochemical classes      | IPA:ACN                                          | MeOH                       | MeOH                      | MeOH:C                                        | ACN                        | ACN:CH                                       |
|-----------------------------|--------------------------|--------------------------------------------------|----------------------------|---------------------------|-----------------------------------------------|----------------------------|----------------------------------------------|
|                             |                          | :H <sub>2</sub> O<br>(3:2:3)<br>(mean +/-<br>SD) | (100%)<br>(mean +/-<br>SD) | (80%)<br>(mean +/-<br>SD) | HCl <sub>3</sub><br>(3:1)<br>(mean +/-<br>SD) | (100%)<br>(mean +/-<br>SD) | Cl <sub>3</sub><br>(3:1)<br>(mean +/-<br>SD) |
| Dodecane                    | Alkanes                  | 4.59±0.01                                        | 4.64±0.02                  | 4.60±0.02                 | 4.59±0.02                                     | 4.60±0.13                  | 4.62±0.06                                    |
| Heptadecane                 | Alkanes                  | NA                                               | NA                         | NA                        | NA                                            | 4.21±0.16                  | 4.20±0.08                                    |
| Pentadecane                 | Alkanes                  | 4.64±0.01                                        | 4.69±0.01                  | 4.66±0.04                 | 4.65±0.02                                     | 4.64±0.14                  | 4.63±0.04                                    |
| Tricosane                   | Alkanes                  | NA                                               | NA                         | NA                        | 4.36±0.12                                     | 4.04±0.13                  | 4.40±0.05                                    |
| Tridecane                   | Alkanes                  | NA                                               | NA                         | NA                        | NA                                            | 4.08±0.14                  | 5.10±0.05                                    |
| beta-Alanine                | Amino acid derivatives   | 3.81±0.06                                        | 3.88±0.02                  | 3.90±0.03                 | 3.74±0.08                                     | NA                         | NA                                           |
| N-Acetylglutamic acid       | Amino acid derivatives   | 3.40±0.04                                        | NA                         | NA                        | NA                                            | NA                         | NA                                           |
| N-alpha-Acetyllysine        | Amino acid derivatives   | NA                                               | NA                         | NA                        | NA                                            | 3.53±0.10                  | 3.66±0.02                                    |
| Norvaline                   | Amino acid derivatives   | 3.43±0.01                                        | 3.45±0.06                  | 3.45±0.05                 | 3.38±0.04                                     | NA                         | NA                                           |
| Ornithine                   | Amino acid derivatives   | 4.51±0.08                                        | 4.22±0.08                  | 4.58±0.05                 | 4.09±0.09                                     | 3.34±0.36                  | NA                                           |
| Pyroglutamic acid           | Amino acid derivatives   | 5.09±0.07                                        | 5.13±0.07                  | NA                        | 4.92±0.12                                     | NA                         | NA                                           |
| Alanine                     | Amino acids              | 6.33±0.04                                        | 6.32±0.02                  | 6.35±0.02                 | 6.31±0.08                                     | 4.91±0.02                  | 4.77±0.04                                    |
| Asparagine                  | Amino acids              | 4.55±0.04                                        | 4.44±0.05                  | 4.56±0.01                 | 4.33±0.01                                     | NA                         | NA                                           |
| Aspartic acid               | Amino acids              | 5.90±0.09                                        | 5.83±0.05                  | 5.97±0.03                 | 5.54±0.12                                     | 4.06±0.07                  | 3.47±0.07                                    |
| Cysteine                    | Amino acids              | 3.68±0.06                                        | 3.64±0.04                  | 3.82±0.01                 | 3.42±0.07                                     | NA                         | NA                                           |
| Glutamic acid               | Amino acids              | 5.51±0.09                                        | 5.48±0.06                  | 5.58±0.01                 | 5.27±0.08                                     | 3.55±0.21                  | 3.03±0.07                                    |
| Glycine                     | Amino acids              | 5.81±0.06                                        | 5.81±0.03                  | 5.86±0.01                 | 5.74±0.09                                     | NA                         | NA                                           |
| Histidine                   | Amino acids              | 4.57±0.12                                        | 4.50±0.05                  | 4.64±0.04                 | 4.48±0.11                                     | NA                         | NA                                           |
| Isoleucine                  | Amino acids              | 5.52±0.09                                        | 5.54±0.04                  | 5.60±0.03                 | 5.53±0.10                                     | 4.78±0.09                  | 4.86±0.06                                    |
| Leucine                     | Amino acids              | 6.05±0.09                                        | 6.06±0.03                  | 6.11±0.03                 | 6.04±0.10                                     | 5.28±0.08                  | 5.36±0.08                                    |
| Lysine                      | Amino acids              | 5.64±0.09                                        | 5.42±0.07                  | 5.69±0.03                 | 5.31±0.10                                     | 3.53±0.17                  | NA                                           |
| Methionine                  | Amino acids              | NA                                               | 4.45±0.08                  | 4.53±0.05                 | 4.30±0.10                                     | 3.22±0.08                  | 3.31±0.05                                    |
| Phenylalanine               | Amino acids              | 5.61±0.09                                        | 5.60±0.04                  | 5.66±0.02                 | 5.58±0.10                                     | 4.68±0.08                  | 4.81±0.07                                    |
| Proline                     | Amino acids              | 5.98±0.08                                        | 5.99±0.04                  | 6.06±0.03                 | 5.98±0.08                                     | 5.16±0.10                  | 5.17±0.07                                    |
| Serine                      | Amino acids              | 4.07±0.09                                        | 4.07±0.09                  | 4.12±0.08                 | 3.93±0.05                                     | NA                         | NA                                           |
| Threonine                   | Amino acids              | 4.81±0.08                                        | 4.73±0.06                  | 4.79±0.04                 | 4.61±0.09                                     | NA                         | NA                                           |
| Tryptophan                  | Amino acids              | 5.51±0.09                                        | 5.49±0.08                  | 5.55±0.06                 | 5.49±0.09                                     | 4.10±0.07                  | 4.37±0.06                                    |
| Tyrosine                    | Amino acids              | 5.63±0.10                                        | 5.60±0.04                  | 5.67±0.05                 | 5.58±0.11                                     | 4.05±0.07                  | 4.07±0.04                                    |
| Valine                      | Amino acids              | 6.00±0.08                                        | 6.01±0.04                  | 6.07±0.03                 | 6.00±0.10                                     | 5.05±0.09                  | 5.08±0.05                                    |
| Benzoic acid                | Benzoic acid derivatives | 4.88±0.02                                        | 4.82±0.03                  | 4.86±0.02                 | 4.75±0.02                                     | 4.19±0.12                  | 4.19±0.03                                    |

|                                              |                            |           |           |           |           |           |           |
|----------------------------------------------|----------------------------|-----------|-----------|-----------|-----------|-----------|-----------|
| DBP                                          | Benzoic acid derivatives   | 4.65±0.01 | 4.63±0.01 | 4.64±0.04 | 4.69±0.01 | 4.62±0.12 | 4.72±0.05 |
| Hydroxybenzoic acid                          | Benzoic acid derivatives   | 5.72±0.06 | 5.67±0.01 | 5.75±0.02 | 5.61±0.02 | 5.37±0.13 | 5.39±0.02 |
| Salicylic acid                               | Benzoic acid derivatives   | 4.28±0.02 | 4.29±0.05 | 4.30±0.01 | 4.25±0.02 | 4.15±0.11 | 4.13±0.04 |
| Syringic acid                                | Benzoic acid derivatives   | 5.55±0.06 | 5.55±0.03 | 5.61±0.03 | 5.47±0.02 | 5.24±0.17 | 5.28±0.01 |
| Vanillic acid                                | Benzoic acid derivatives   | 4.80±0.07 | 4.81±0.05 | 4.87±0.03 | 4.69±0.02 | 4.42±0.14 | 4.43±0.03 |
| 10,13-dimethyltetradecanoic acid (C17_0)     | Long-chain saturated FAs   | 6.51±0.02 | 6.51±0.01 | 6.47±0.03 | 6.52±0.03 | 6.46±0.14 | 6.53±0.05 |
| Arachidic acid (C20_0)                       | Long-chain saturated FAs   | NA        | NA        | NA        | NA        | 4.44±0.11 | 4.56±0.05 |
| Arachidonic acid (C20_4n-6,9,12,15c)         | Long-chain saturated FAs   | NA        | NA        | NA        | NA        | 3.56±0.14 | NA        |
| Behenic acid (C22_0)                         | Long-chain saturated FAs   | 4.79±0.06 | 4.88±0.05 | 4.71±0.05 | 4.85±0.07 | 4.47±0.10 | 4.68±0.05 |
| Heneicosanoic acid (C21_0)                   | Long-chain saturated FAs   | NA        | 3.95±0.07 | NA        | NA        | NA        | 3.73±0.06 |
| Lignoceric acid (C24_0)                      | Long-chain saturated FAs   | 4.24±0.05 | 4.59±0.11 | 3.82±0.09 | 4.52±0.07 | 3.84±0.13 | 4.34±0.06 |
| Margaric acid (C17_0)                        | Long-chain saturated FAs   | 4.74±0.03 | 4.72±0.02 | 4.70±0.01 | 4.71±0.02 | 4.63±0.12 | 4.70±0.04 |
| Myristic acid (C14_0)                        | Long-chain saturated FAs   | 5.03±0.05 | 5.07±0.03 | 5.01±0.03 | 5.07±0.05 | 5.01±0.14 | 5.05±0.06 |
| Palmitic acid (C16_0)                        | Long-chain saturated FAs   | 4.81±0.01 | NA        | NA        | NA        | NA        | NA        |
| Pentadecanoic acid (C15_0)                   | Long-chain saturated FAs   | 4.78±0.04 | 4.79±0.02 | 4.74±0.02 | 4.74±0.02 | 4.68±0.12 | 4.74±0.04 |
| Stearic acid (C18_0)                         | Long-chain saturated FAs   | 6.20±0.05 | 6.22±0.02 | 6.09±0.06 | 6.25±0.03 | 6.13±0.13 | 6.27±0.11 |
| Tricosanoic acid (C23_0)                     | Long-chain saturated FAs   | 3.86±0.04 | 4.09±0.11 | 3.65±0.07 | 4.00±0.05 | 3.45±0.12 | 3.78±0.04 |
| 11,14,17-Eicosatrienoic acid (C20_3n-3,6,9c) | Long-Chain unsaturated FAs | NA        | NA        | 3.48±0.02 | NA        | 3.41±0.12 | 3.46±0.04 |
| 11,14-Eicosadienoic acid (C20_2n-6,9c)       | Long-Chain unsaturated FAs | 3.74±0.03 | 3.77±0.04 | 3.74±0.01 | 3.76±0.03 | 3.66±0.14 | 3.74±0.06 |
| Conjugated linoleic acid (C18_2n-9,11c)      | Long-Chain unsaturated FAs | 6.26±0.02 | 6.26±0.01 | 6.26±0.02 | 6.24±0.02 | 6.25±0.13 | 6.27±0.04 |
| gamma-Linolenic acid (C18_3n-6,9,12c)        | Long-Chain unsaturated FAs | 6.40±0.01 | 6.37±0.02 | 6.39±0.04 | 6.39±0.01 | 6.42±0.14 | 6.41±0.04 |
| Linoleic acid (C18_2n-6,9c)                  | Long-Chain unsaturated FAs | 4.17±0.08 | NA        | 4.22±0.05 | 4.16±0.05 | 4.09±0.11 | 4.16±0.03 |
| Oleic acid (C18_1n-9c)                       | Long-Chain unsaturated FAs | 5.57±0.01 | 5.54±0.03 | 5.78±0.05 | 5.77±0.01 | NA        | 5.56±0.04 |
| Palmitelaidic acid (C16_1n-9c)               | Long-Chain unsaturated FAs | 3.87±0.04 | 3.95±0.07 | 3.86±0.03 | 3.82±0.04 | 3.75±0.11 | 3.82±0.04 |
| Palmitoleic acid (C16_1n-7c)                 | Long-Chain unsaturated FAs | 5.86±0.02 | NA        | 5.82±0.03 | 5.87±0.03 | 5.82±0.14 | 5.88±0.05 |
| trans-Vaccenic acid                          | Long-Chain unsaturated FAs | NA        | NA        | NA        | 5.55±0.02 | 5.51±0.15 | NA        |
| 2-Aminoadipic acid                           | Medium-chain saturated FAs | 3.34±0.06 | 3.37±0.02 | 3.42±0.04 | NA        | NA        | NA        |
| Adipic acid                                  | Medium-chain saturated FAs | NA        | NA        | NA        | NA        | 3.63±0.14 | NA        |
| Azelaic acid                                 | Medium-chain saturated FAs | 3.94±0.03 | 3.94±0.04 | 3.97±0.03 | 3.82±0.07 | 3.57±0.12 | 3.57±0.03 |

|                         |                             |           |           |           |           |           |           |
|-------------------------|-----------------------------|-----------|-----------|-----------|-----------|-----------|-----------|
| Caprinic acid           | Medium-chain saturated FAs  | 3.83±0.03 | 4.00±0.02 | 3.84±0.03 | 3.95±0.01 | 3.83±0.14 | 3.78±0.04 |
| Decanoic acid (C10_0)   | Medium-chain saturated FAs  | 4.32±0.06 | 4.28±0.02 | 4.31±0.02 | 4.23±0.08 | 4.13±0.11 | 4.19±0.03 |
| Dodecanoic acid (C12_0) | Medium-chain saturated FAs  | 4.57±0.03 | 4.64±0.02 | 4.50±0.02 | 4.66±0.03 | 4.57±0.15 | 4.54±0.04 |
| Octanoic acid (C8_0)    | Medium-chain saturated FAs  | 3.83±0.01 | 3.91±0.06 | 3.88±0.05 | 3.85±0.03 | 3.73±0.11 | 3.67±0.03 |
| Suberic acid            | Medium-chain saturated FAs  | NA        | 3.33±0.01 | 3.37±0.05 | 3.25±0.02 | NA        | NA        |
| Nicotinamide            | Nicotinamides and Vitamines | 3.83±0.11 | 3.95±0.06 | 3.93±0.07 | 3.96±0.08 | 3.96±0.12 | 3.87±0.04 |
| Nicotinic acid          | Nicotinamides and Vitamines | 3.42±0.05 | 3.34±0.02 | 3.44±0.05 | NA        | 5.78±0.08 | NA        |
| Creatinine              | Secondary metabolites       | 4.61±0.18 | 4.60±0.10 | 4.63±0.04 | 4.50±0.12 | 3.80±0.07 | 3.80±0.12 |
| Glutathione             | Secondary metabolites       | 4.79±0.06 | 4.72±0.04 | 4.85±0.02 | 4.58±0.07 | 3.20±0.06 | NA        |
| Lactic acid             | Secondary metabolites       | 6.71±0.03 | 6.68±0.01 | 6.70±0.01 | 6.68±0.02 | 6.27±0.11 | 6.03±0.08 |
| 2-Oxoglutaric acid      | TCA cycle intermediates     | 5.26±0.08 | 5.22±0.06 | 5.31±0.05 | 5.14±0.09 | NA        | NA        |
| cis-Aconitic acid       | TCA cycle intermediates     | 4.12±0.04 | 3.87±0.01 | 4.12±0.06 | 3.49±0.04 | NA        | NA        |
| Citric acid             | TCA cycle intermediates     | 5.00±0.04 | 4.60±0.06 | 4.98±0.03 | 4.08±0.05 | NA        | NA        |
| Fumaric acid            | TCA cycle intermediates     | 4.68±0.06 | 4.64±0.03 | 4.70±0.01 | 4.36±0.08 | 3.45±0.01 | NA        |
| Malic acid              | TCA cycle intermediates     | 4.57±0.08 | 4.41±0.05 | 4.65±0.04 | 4.05±0.12 | 3.57±0.06 | NA        |
| Succinic acid           | TCA cycle intermediates     | 6.21±0.08 | 6.18±0.02 | 6.22±0.02 | 6.11±0.09 | 5.21±0.04 | 5.05±0.02 |

**Supplementary Table S5.** The semi-quantitative log values of identified metabolites in baby giant panda feces, across the six different extraction methods

| Identified metabolite names | Biochemical classes    | IPA:ACN                                 | MeOH                 | MeOH                | MeOH:C                               | ACN                  | ACN:CH                              |
|-----------------------------|------------------------|-----------------------------------------|----------------------|---------------------|--------------------------------------|----------------------|-------------------------------------|
|                             |                        | :H <sub>2</sub> O (3:2:3) (mean +/- SD) | (100%) (mean +/- SD) | (80%) (mean +/- SD) | HCl <sub>3</sub> (3:1) (mean +/- SD) | (100%) (mean +/- SD) | Cl <sub>3</sub> (3:1) (mean +/- SD) |
| Dodecane                    | Alkanes                | 4.63±0.01                               | 4.61±0.01            | 4.60±0.02           | 4.63±0.03                            | 4.60±0.05            | 4.63±0.03                           |
| Heptadecane                 | Alkanes                | NA                                      | NA                   | NA                  | NA                                   | 4.26±0.09            | 4.22±0.02                           |
| Pentadecane                 | Alkanes                | 4.67±0.01                               | 4.63±0.01            | 4.64±0.03           | 4.64±0.03                            | 4.59±0.04            | 4.64±0.02                           |
| Tridecane                   | Alkanes                | NA                                      | 4.05±0.05            | 4.09±0.03           | 4.09±0.03                            | 4.08±0.05            | 4.08±0.03                           |
| beta-Alanine                | Amino acid derivatives | 4.14±0.03                               | 3.91±0.04            | 4.16±0.02           | 3.85±0.04                            | 3.59±0.03            | 3.74±0.02                           |
| beta-Citryl-L-glutamic acid | Amino acid derivatives | 3.67±0.08                               | NA                   | NA                  | NA                                   | NA                   | NA                                  |
| N-(Carboxymethyl)-L-alanine | Amino acid derivatives | NA                                      | 3.39±0.14            | NA                  | NA                                   | NA                   | NA                                  |
| N-Acetylglutamic acid       | Amino acid derivatives | 3.72±0.01                               | 3.48±0.02            | 3.66±0.04           | 3.47±0.04                            | NA                   | NA                                  |
| N-alpha-Acetyllysine        | Amino acid derivatives | NA                                      | 3.71±0.27            | NA                  | NA                                   | 3.62±0.09            | NA                                  |
| Ornithine                   | Amino acid derivatives | 4.83±0.05                               | 4.19±0.10            | 4.83±0.18           | 4.16±0.03                            | NA                   | NA                                  |
| Pyroglutamic acid           | Amino acid derivatives | 4.77±0.01                               | 4.48±0.05            | NA                  | 4.39±0.02                            | 3.61±0.07            | 3.72±0.04                           |
| Alanine                     | Amino acids            | 5.89±0.03                               | 5.68±0.02            | 5.91±0.02           | 5.65±0.03                            | 4.34±0.20            | NA                                  |
| Asparagine                  | Amino acids            | 4.04±0.06                               | NA                   | NA                  | NA                                   | NA                   | NA                                  |
| Aspartic acid               | Amino acids            | 5.59±0.06                               | 5.23±0.04            | 5.63±0.02           | 5.06±0.03                            | 3.63±0.19            | 3.40±0.11                           |

|                                          |                             |           |           |           |           |           |           |
|------------------------------------------|-----------------------------|-----------|-----------|-----------|-----------|-----------|-----------|
| Cysteine                                 | Amino acids                 | 4.70±0.07 | 4.11±0.04 | 4.66±0.07 | 4.23±0.02 | 2.84±0.44 | 3.08±0.05 |
| Glutamic acid                            | Amino acids                 | 4.90±0.11 | 4.54±0.06 | 4.86±0.02 | 4.51±0.09 | 2.98±0.24 | NA        |
| Glycine                                  | Amino acids                 | 5.63±0.01 | 5.36±0.02 | 5.65±0.03 | 5.26±0.03 | NA        | NA        |
| Histidine                                | Amino acids                 | 4.46±0.03 | NA        | 4.45±0.11 | NA        | NA        | NA        |
| Isoleucine                               | Amino acids                 | 5.48±0.02 | 5.35±0.03 | 5.51±0.03 | 5.31±0.03 | 4.21±0.16 | 4.44±0.04 |
| Leucine                                  | Amino acids                 | 5.79±0.01 | 5.58±0.01 | 5.76±0.02 | 5.57±0.03 | 4.49±0.14 | 4.72±0.02 |
| Lysine                                   | Amino acids                 | 5.29±0.07 | 4.56±0.07 | 5.18±0.08 | 4.58±0.03 | NA        | NA        |
| Methionine                               | Amino acids                 | 3.82±0.22 | 4.04±0.04 | 4.26±0.09 | 3.79±0.08 | 2.83±0.08 | NA        |
| Phenylalanine                            | Amino acids                 | 5.26±0.01 | 5.05±0.01 | 5.24±0.03 | 5.02±0.02 | 3.91±0.16 | 4.11±0.02 |
| Proline                                  | Amino acids                 | 5.67±0.01 | 5.49±0.01 | 5.70±0.02 | 5.46±0.03 | 4.49±0.08 | 4.59±0.01 |
| Serine                                   | Amino acids                 | 4.11±0.05 | 3.65±0.13 | 4.01±0.11 | 3.67±0.05 | NA        | NA        |
| Threonine                                | Amino acids                 | 4.86±0.01 | 4.37±0.07 | 4.75±0.06 | 4.39±0.05 | NA        | NA        |
| Tryptophan                               | Amino acids                 | 6.04±0.03 | 5.76±0.01 | 6.00±0.04 | 5.70±0.03 | 3.94±0.31 | 4.52±0.05 |
| Tyrosine                                 | Amino acids                 | 4.81±0.03 | 4.44±0.01 | 4.72±0.08 | 4.43±0.05 | 2.93±0.26 | NA        |
| Valine                                   | Amino acids                 | 5.94±0.01 | 5.75±0.02 | 5.94±0.02 | 5.71±0.02 | 4.52±0.16 | 4.66±0.03 |
| Benzoic acid                             | Benzoic acid derivatives    | 4.03±0.01 | 4.15±0.02 | 3.95±0.03 | NA        | 4.00±0.05 | 4.18±0.05 |
| DBP                                      | Benzoic acid derivatives    | 4.63±0.03 | 4.57±0.01 | 4.62±0.03 | 4.62±0.02 | 4.51±0.04 | 4.58±0.02 |
| Hydroxybenzoic acid                      | Benzoic acid derivatives    | 4.07±0.01 | NA        | 4.08±0.04 | NA        | NA        | NA        |
| Salicylic acid                           | Benzoic acid derivatives    | NA        | NA        | 3.37±0.86 | NA        | NA        | NA        |
| Adipic acid                              | Medium-chain saturated FAs  | 3.94±0.03 | 3.81±0.04 | 3.94±0.10 | 3.82±0.02 | 3.55±0.02 | 3.68±0.05 |
| Azelaic acid                             | Medium-chain saturated FAs  | 3.47±0.04 | 3.25±0.05 | NA        | 3.35±0.06 | 3.10±0.05 | 3.21±0.03 |
| Decanoic acid (C10_0)                    | Medium-chain saturated FAs  | 4.30±0.04 | 3.99±0.01 | 4.10±0.02 | 4.10±0.02 | 3.74±0.07 | 3.88±0.05 |
| Dodecanoic acid (C12_0)                  | Medium-chain saturated FAs  | 5.77±0.03 | 5.47±0.06 | 5.57±0.03 | 5.54±0.06 | 5.41±0.07 | 5.55±0.10 |
| Hexanoic acid (C6_0)                     | Medium-chain saturated FAs  | 4.03±0.06 | 3.67±0.07 | 3.76±0.06 | 3.98±0.08 | NA        | NA        |
| Octanoic acid (C8_0)                     | Medium-chain saturated FAs  | 3.79±0.04 | 3.60±0.03 | 3.64±0.05 | 3.61±0.06 | 3.40±0.05 | 3.47±0.04 |
| Suberic acid                             | Medium-chain saturated FAs  | 4.43±0.03 | 3.70±0.04 | 3.90±0.05 | 3.74±0.04 | 5.43±0.06 | 3.46±0.02 |
| Nicotinamide                             | Nicotinamides and Vitamines | 3.84±0.03 | 3.77±0.02 | 3.79±0.04 | 3.82±0.06 | 3.79±0.06 | 3.81±0.02 |
| 10,13-dimethyltetradecanoic acid (C17_0) | Long-chain saturated FAs    | 6.81±0.01 | 6.77±0.02 | 6.78±0.02 | 6.78±0.02 | 6.75±0.05 | 6.77±0.01 |
| 2-Methyloctadecanoic acid                | Long-chain saturated FAs    | NA        | NA        | NA        | NA        | 3.75±0.15 | 4.19±0.14 |
| Arachidic acid (C20_0)                   | Long-chain saturated FAs    | 5.22±0.01 | 5.13±0.05 | 4.90±0.04 | 5.20±0.05 | 4.89±0.05 | 5.04±0.04 |
| Arachidonic acid (C20_4n-6,9,12,15c)     | Long-chain saturated FAs    | 6.17±0.01 | 6.15±0.02 | 6.12±0.03 | 6.13±0.01 | 5.72±0.06 | 5.93±0.04 |
| Behenic acid (C22_0)                     | Long-chain saturated FAs    | 5.00±0.02 | 5.00±0.06 | 4.39±0.01 | 5.07±0.04 | 4.70±0.05 | 4.94±0.06 |
| Heneicosanoic acid (C21_0)               | Long-chain saturated FAs    | 3.96±0.03 | 3.91±0.04 | NA        | 3.96±0.05 | 3.49±0.07 | 3.73±0.03 |
| Lignoceric acid (C24_0)                  | Long-chain saturated FAs    | 4.58±0.02 | 4.75±0.05 | NA        | 4.87±0.03 | 4.20±0.06 | 4.63±0.06 |
| Margaric acid (C17_0)                    | Long-chain saturated FAs    | 5.13±0.02 | 4.99±0.06 | 4.94±0.04 | 5.03±0.04 | 4.73±0.07 | 4.86±0.05 |
| Myristic acid (C14_0)                    | Long-chain saturated FAs    | 6.46±0.02 | 6.32±0.04 | 6.34±0.02 | 6.34±0.04 | 6.21±0.06 | 6.30±0.06 |



|                                               |                            |           |           |           |           |           |           |
|-----------------------------------------------|----------------------------|-----------|-----------|-----------|-----------|-----------|-----------|
| Nonadecanoic acid (C19_0)                     | Long-chain saturated FAs   | 4.84±0.01 | 4.80±0.02 | 4.61±0.07 | 4.83±0.03 | 4.06±0.07 | 4.29±0.05 |
| Pentadecanoic acid (C15_0)                    | Long-chain saturated FAs   | 5.24±0.02 | 5.11±0.03 | 5.12±0.03 | 5.14±0.03 | 4.87±0.08 | 5.01±0.04 |
| Stearic acid (C18_0)                          | Long-chain saturated FAs   | 6.79±0.01 | 6.77±0.02 | 6.74±0.02 | 6.78±0.02 | 6.70±0.04 | 6.73±0.01 |
| Tricosanoic acid (C23_0)                      | Long-chain saturated FAs   | 4.04±0.04 | 4.10±0.07 | NA        | 4.25±0.05 | 3.60±0.04 | 3.99±0.04 |
| Creatinine                                    | Secondary metabolites      | 4.53±0.07 | 4.35±0.06 | 4.51±0.07 | 4.28±0.08 | 3.13±0.10 | 3.54±0.05 |
| Glutathione                                   | Secondary metabolites      | 4.12±0.03 | 3.92±0.04 | 4.17±0.01 | 3.75±0.06 | #NUM!     | NA        |
| Lactic acid                                   | Secondary metabolites      | 5.81±0.01 | 5.51±0.04 | 5.76±0.02 | 5.47±0.05 | 4.38±0.13 | 4.35±0.09 |
| 2-Oxoglutaric acid                            | TCA cycle intermediates    | 3.91±0.06 | 3.60±0.03 | 3.85±0.05 | 3.59±0.04 | 4.40±0.13 | NA        |
| cis-Aconitic acid                             | TCA cycle intermediates    | 3.63±0.03 | 3.46±0.06 | 3.71±0.03 | 3.39±0.05 | NA        | NA        |
| Citric acid                                   | TCA cycle intermediates    | 3.93±0.05 | NA        | 3.83±0.06 | NA        | NA        | NA        |
| Fumaric acid                                  | TCA cycle intermediates    | 3.88±0.03 | 3.61±0.06 | 3.73±0.01 | 3.61±0.02 | NA        | NA        |
| Malic acid                                    | TCA cycle intermediates    | 3.94±0.03 | 3.61±0.07 | 3.67±0.05 | 3.84±0.19 | 3.33±0.10 | 3.39±0.14 |
| Succinic acid                                 | TCA cycle intermediates    | 6.09±0.02 | 5.94±0.04 | 6.05±0.02 | 5.92±0.03 | 5.42±0.07 | 5.82±0.05 |
| 10,12-octadecadienoic acid (C18_2n-10,12c)    | Long-chain unsaturated FAs | NA        | NA        | 3.99±0.05 | NA        | NA        | NA        |
| 10-Heptadecenoic acid (C17_1n-7t)             | Long-chain unsaturated FAs | 5.14±0.03 | 5.13±0.04 | 5.10±0.06 | 5.14±0.03 | 4.49±0.07 | 4.75±0.04 |
| 11,14,17-Eicosatrienoic acid (C20_3n-3,6,9c)  | Long-chain unsaturated FAs | 4.79±0.02 | 4.73±0.03 | 4.69±0.05 | 4.74±0.03 | 4.27±0.07 | 4.48±0.05 |
| 11,14-Eicosadienoic acid (C20_2n-6,9c)        | Long-chain unsaturated FAs | 5.26±0.01 | 5.22±0.02 | 5.15±0.04 | 5.24±0.01 | 4.76±0.07 | 4.98±0.05 |
| 13,16-Docosadienoic acid (C22_2n-6,9c)        | Long-chain unsaturated FAs | 4.33±0.01 | 4.38±0.02 | NA        | 4.36±0.03 | 3.83±0.07 | 4.12±0.07 |
| Adrenic acid (C22_4n-6,9,12,15c)              | Long-chain unsaturated FAs | 4.93±0.02 | 4.86±0.04 | 4.79±0.05 | 4.90±0.02 | 4.16±0.06 | 4.53±0.05 |
| bishomo-gamma-Linolenic acid (C20_3n-6,9,12c) | Long-chain unsaturated FAs | 5.81±0.01 | 5.80±0.01 | 5.74±0.02 | 5.79±0.01 | 5.35±0.07 | 5.55±0.05 |
| Conjugated linoleic acid (C18_2n-9,11c)       | Long-chain unsaturated FAs | 4.05±0.03 | 3.95±0.02 | NA        | 4.02±0.05 | 3.57±0.05 | 3.76±0.03 |
| DHA (C22_6n-3,6,9,12,15,18c)                  | Long-chain unsaturated FAs | 5.72±0.01 | 5.65±0.04 | 5.63±0.03 | 5.64±0.02 | 5.08±0.06 | 5.37±0.05 |
| DPA (C22_5n-3,6,9,12,15c)                     | Long-chain unsaturated FAs | 5.34±0.01 | 5.29±0.04 | 5.23±0.03 | 5.28±0.01 | 4.67±0.05 | 5.00±0.06 |
| gamma-Linolenic acid (C18_3n-6,9,12c)         | Long-chain unsaturated FAs | NA        | NA        | 5.08±0.03 | NA        | 4.17±0.05 | 4.97±0.04 |
| Gondoic acid (C20_1n-9c)                      | Long-chain unsaturated FAs | 5.24±0.06 | 5.43±0.05 | 5.33±0.10 | 5.46±0.06 | 4.76±0.05 | 4.98±0.09 |
| Linoleic acid (C18_2n-6,9c)                   | Long-chain unsaturated FAs | 6.21±0.02 | 6.20±0.02 | 6.19±0.03 | 6.20±0.02 | 5.90±0.06 | 6.04±0.03 |
| Myristoleic acid (C14_1n-5c)                  | Long-chain unsaturated FAs | 3.83±0.01 | 3.71±0.02 | 3.78±0.02 | 3.76±0.01 | NA        | NA        |
| Nervonic acid (C24_1n-9c)                     | Long-chain unsaturated FAs | 4.82±0.01 | 4.82±0.08 | 4.34±0.07 | 4.88±0.04 | 4.25±0.05 | 4.66±0.06 |

|                                |                            |           |           |           |           |           |           |
|--------------------------------|----------------------------|-----------|-----------|-----------|-----------|-----------|-----------|
| Oleic acid (C18_1n-9c)         | Long-chain unsaturated FAs | 6.18±0.01 | NA        | 6.15±0.02 | 6.16±0.02 | 5.85±0.05 | 6.14±0.01 |
| Palmitelaidic acid (C16_1n-9c) | Long-chain unsaturated FAs | 5.09±0.02 | 5.06±0.02 | 5.06±0.03 | 5.06±0.03 | 4.64±0.07 | 4.83±0.05 |
| trans-Vaccenic acid            | Long-chain unsaturated FAs | NA        | 6.16±0.02 | NA        | NA        | 5.93±0.06 | 6.04±0.03 |

Supplementary Table S6. The total amount of estimated time for sample preparation, derivatization, and GC-MS analysis per sample.

| <b>Steps</b>       | <b>Descriptions</b>                       | <b>Duration</b>  |
|--------------------|-------------------------------------------|------------------|
| Sample Preparation | Grind sample with pestle and mortar       | 2 min            |
|                    | Weight sample                             | 0.5 min          |
|                    | Add extraction solvents                   | 1 min            |
|                    | Homogenize by Tissuelyser                 | 3 min            |
|                    | Centrifugation                            | 15 min           |
|                    | Dry samples by SpeedVac                   | 180 min          |
| Derivatization     | Time for MCF reaction time                | 1 min            |
|                    | Add reagent                               | 1 min            |
|                    | Vortex                                    | 0.1 min          |
|                    | Centrifugation                            | 5 min            |
|                    | Extract metabolites from chloroform phase | 1 min            |
| GC-MS analysis     | Inject sample and wish syringe            | 3 min            |
|                    | GC-MS analysis time                       | 43 min           |
| <b>Total Time:</b> |                                           | <b>255.6 min</b> |
